# Supplementary material
Source: PubMed Central journal article supplement (PMC2740987)
Supplement: NIHMS130872-supplement-Supplemental_Data.pdf [file NIHMS130872-supplement-Supplemental_Data.pdf]

## SUPPLEMENTAL DATA

This material is an online-only supplement to the following article: Binkley CJ, Beacham A, Neace W, Gregg RG, Liem EB, Sessler DI. Genetic variations associated with red hair color and dental anxiety, fear of dental pain and avoidance of dental care. *JADA* 2009;140(7):896-905. Copyright © 2009 American Dental Association. All rights reserved.

### GENETIC ANALYSIS

We obtained venous blood samples (5 milliliters) from the volunteer's arm as in our previous studies.<sup>1,2</sup> We analyzed these samples for genes related to hair color only.

None of the results were disclosed to the volunteers. We extracted DNA from the blood samples by using the PureGene DNA isolation kits (Gentra Systems, Minneapolis).

We genotyped samples for 29insA, V60L, K65N, D84E, V92M, R142H, R151C, Y152X, I155T, R160W, R163Q, I293M, D294H and A299T variants using a Pyromark Pyrosequencing system (Biotage, Charlottesville, Va.). The polymerase chain reaction (PCR) primers and detection primers are listed in Table 1. To generate the PCR products, we used a PCR mix containing the following in 40 microliters of 1x Accuprime buffer II (Invitrogen, Carlsbad, Calif.): 50 to 100 nanograms of DNA, 2 units of Accuprime Taq polymerase and accompanying buffer (Invitrogen) and 0.3 micromolars of each primer. We amplified the DNA for 36 cycles (0.5 minute at 95°C, 0.5 minute at 55°C, 0.5 minutes at 68°C). We analyzed amplified products by means of agarose gel electrophoresis to ensure PCR success. We purified the biotinylated single-stranded DNA and did pyrosequencing reactions as recommended by the manufacturer (Biotage).

We also sequenced a subset of 53 samples. We generated two overlapping PCR amplicons that cover the entire open reading frame using primers: P5-F: 5'-ACTCCTTCCTGCTTCCTGGA and P12-R: 5'- TGGTCGTAGTAGGCGATGAA; P9-F: 5'- GCAGCAGCTGGACAATGTCA and 5'- ACTGCCAGGGTCACACAGG. We purified the PCR fragments by using a Qiaquick PCR purification system (Qiagen, Valencia,

## SUPPLEMENTAL DATA

This material is an online-only supplement to the following article: Binkley CJ, Beacham A, Neace W, Gregg RG, Liem EB, Sessler DI. Genetic variations associated with red hair color and dental anxiety, fear of dental pain and avoidance of dental care. JADA 2009;140(7):896-905. Copyright © 2009 American Dental Association. All rights reserved.

Calif.), and we sequenced approximately 20 ng using the ABI Big Dye sequencing system and an ABI3130 XL DNA sequencer (Applied Biosystems, Foster City, Calif.). We analyzed the sequence and detected single nucleotide polymorphisms by using onboard sequencing analyses software for heterozygote detection. Our genotyping results are shown in Table 2.<sup>3</sup> ■

1. Liem EB, Joiner TV, Tsueda K, Sessler DI. Increased sensitivity to thermal pain and reduced subcutaneous lidocaine efficacy in redheads. *Anesthesiology* 2005;102(3):509-514.
2. Liem EB, Lin CM, Suleman MI, et al. Anesthetic requirement is increased in redheads. *Anesthesiology* 2004;101(2):279-283.
3. García-Borrón JC, Sánchez-Laorden BL, Jiménez-Cervantes C. Melanocortin-1 receptor structure and functional regulation. *Pigment Cell Res* 2005;18(6):393-410.

**Table 1**  
**Primers used for SNP\* genotyping.**

| MELANCORTIN-1 RECEPTOR GENE VARIANT            | BIOTINYLATED PRIMER*     | PAIRED PRIMER            | SNP SEQUENCING PRIMER |
|------------------------------------------------|--------------------------|--------------------------|-----------------------|
| V60L, K65N                                     | TGAAGCAGTAC<br>ATGGGTGAG | CTGGTGAGCTT<br>GGTGGAGAA | GTGGAGAACGC<br>GCTG   |
| R142H, R151C,<br>Y152X, I155T,<br>R160W, R163Q | CGATGAAGAGC<br>GTGCTGAAG | CTGCAGCTCCA<br>TGCTGTCC  | CGCCATCGCCG<br>TGGA   |
| I293M, D294H,<br>A299T                         | TGCCCAGGGTC<br>ACACAGG   | ACGTGCGGCTG<br>CATCTTC   | CATCTGCAATG<br>CCAT   |

\* SNP: Single nucleotide polymorphism.

**SUPPLEMENTAL DATA**

This material is an online-only supplement to the following article: Binkley CJ, Beacham A, Neace W, Gregg RG, Liem EB, Sessler DI. Genetic variations associated with red hair color and dental anxiety, fear of dental pain and avoidance of dental care. JADA 2009;140(7):896-905. Copyright © 2009 American Dental Association. All rights reserved.

**Table 2**  
**MC1R Variants\* Hair Color Crosstabulation.**

| <b>MC1R VARIANTS</b>                                                    | <b>HAIR COLOR</b> |            | <b>TOTAL</b> |
|-------------------------------------------------------------------------|-------------------|------------|--------------|
|                                                                         | <b>Dark</b>       | <b>Red</b> |              |
| <b>No Variants</b>                                                      | 30                | 1          | <b>31</b>    |
| <b>Variants Most Likely to Decrease Melanocyte Function<sup>3</sup></b> |                   |            |              |
| 29insA;N279S                                                            | 0                 | 1          | <b>1</b>     |
| D294H                                                                   | 4                 | 0          | <b>4</b>     |
| D294H;D294H                                                             | 0                 | 1          | <b>1</b>     |
| D294H;R151C                                                             | 0                 | 5          | <b>5</b>     |
| D294H;R160W                                                             | 0                 | 1          | <b>1</b>     |
| D84E;D294H                                                              | 0                 | 1          | <b>1</b>     |
| D84E;R151C                                                              | 0                 | 1          | <b>1</b>     |
| I155T;V60L                                                              | 1                 | 0          | <b>1</b>     |
| R142H; V60L                                                             | 1                 | 0          | <b>1</b>     |
| R142H;R151C                                                             | 0                 | 3          | <b>3</b>     |
| R142H;R160W                                                             | 0                 | 1          | <b>1</b>     |
| R151C                                                                   | 5                 | 1          | <b>6</b>     |
| R151C;29insA                                                            | 0                 | 4          | <b>4</b>     |
| R151C;D294H                                                             | 0                 | 2          | <b>2</b>     |
| R151C;I155T                                                             | 0                 | 1          | <b>1</b>     |
| R151C;R142H                                                             | 0                 | 1          | <b>1</b>     |
| R151C;R151C                                                             | 0                 | 11         | <b>11</b>    |
| R151C;R160W                                                             | 1                 | 10         | <b>11</b>    |
| R151C;R160W;D294H                                                       | 0                 | 2          | <b>2</b>     |
| R151C;R163Q                                                             | 1                 | 0          | <b>1</b>     |
| R151C;S83P                                                              | 0                 | 1          | <b>1</b>     |
| R151C;V60L                                                              | 1                 | 4          | <b>5</b>     |
| R151C;V92M                                                              | 1                 | 1          | <b>2</b>     |
| R160;V60L                                                               | 0                 | 1          | <b>1</b>     |
| R160W                                                                   | 5                 | 0          | <b>5</b>     |
| R160W;D84E                                                              | 0                 | 1          | <b>1</b>     |

**SUPPLEMENTAL DATA**

This material is an online-only supplement to the following article: Binkley CJ, Beacham A, Neace W, Gregg RG, Liem EB, Sessler DI. Genetic variations associated with red hair color and dental anxiety, fear of dental pain and avoidance of dental care. JADA 2009;140(7):896-905. Copyright © 2009 American Dental Association. All rights reserved.

|                                                                                    |           |           |            |
|------------------------------------------------------------------------------------|-----------|-----------|------------|
| R160W;R160W                                                                        | 0         | 9         | <b>9</b>   |
| R160W;V60L                                                                         | 0         | 2         | <b>2</b>   |
| <b>Variants Least Likely to Decrease<br/>Melanocyte Function (Neutral Alleles)</b> |           |           |            |
| R163Q                                                                              | 4         | 0         | <b>4</b>   |
| R163Q;V92M                                                                         | 2         | 0         | <b>2</b>   |
| V60L                                                                               | 12        | 1         | <b>13</b>  |
| V60L;R163Q                                                                         | 1         | 0         | <b>1</b>   |
| V60L;V60L                                                                          | 2         | 0         | <b>2</b>   |
| V60L;V92M                                                                          | 1         | 0         | <b>1</b>   |
| V92M                                                                               | 4         | 0         | <b>4</b>   |
| V92M;V92M                                                                          | 1         | 0         | <b>1</b>   |
| <b>TOTAL</b>                                                                       | <b>77</b> | <b>67</b> | <b>144</b> |
